# Supplementary material
Source: PubMed Central journal article supplement (PMC6526502)

# Supplemental Figure 1

**A**

**C57Bl/6 RA**

**CD1 RA**

**C57Bl/6 BPD**

**CD1 BPD**

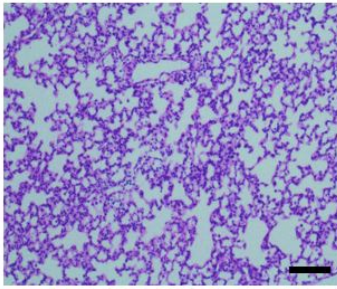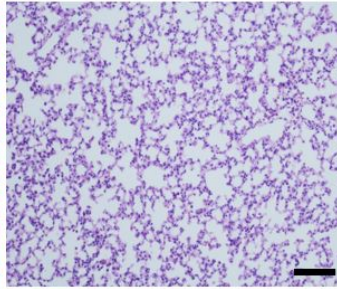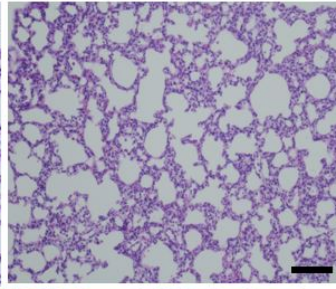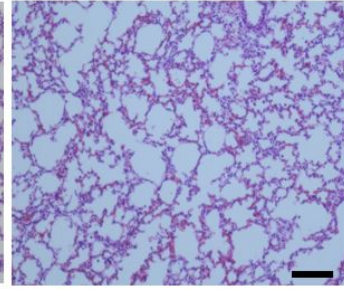

**C57Bl/6**

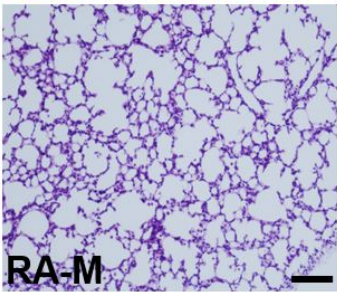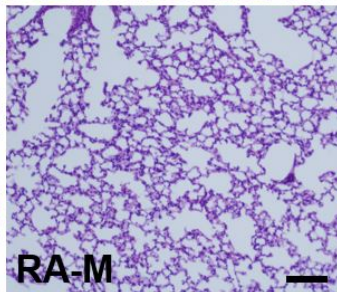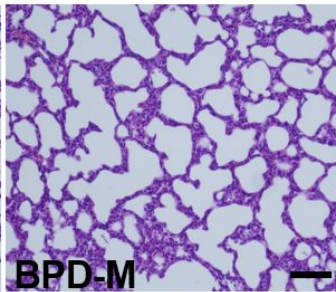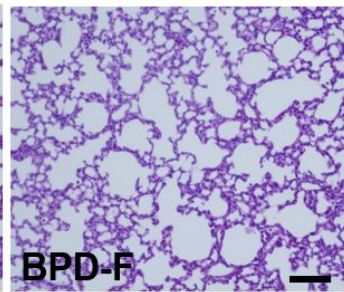

**B**

**RA-F**

**RA-M**

**BPD-F**

**BPD-M**

**C57Bl/6**

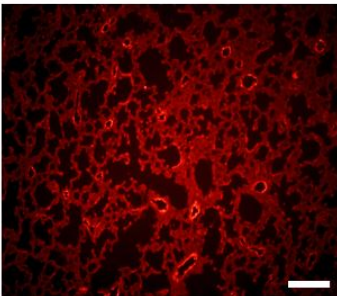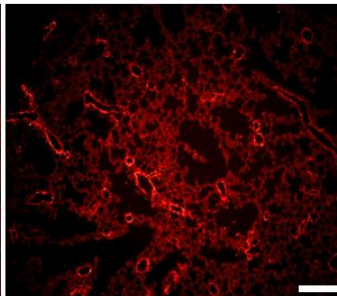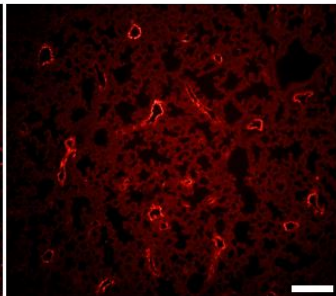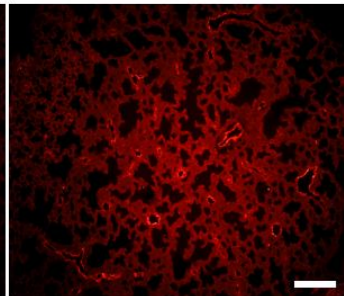

**CD1**

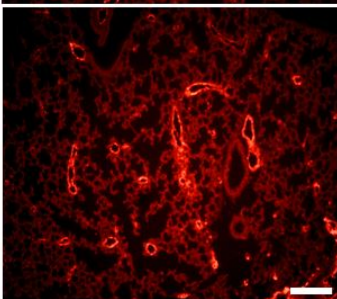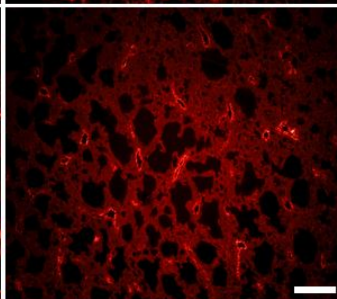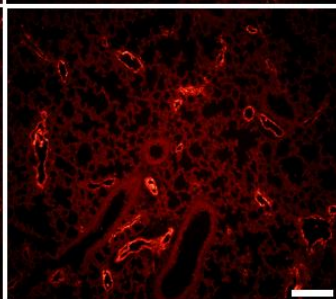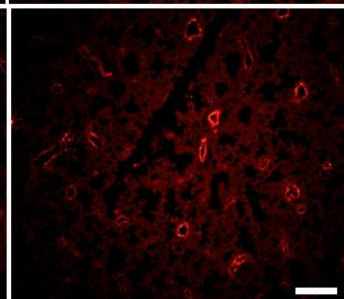

Supplement: mmc1.pdf [file mmc1.pdf]

# Supplemental Figure 2

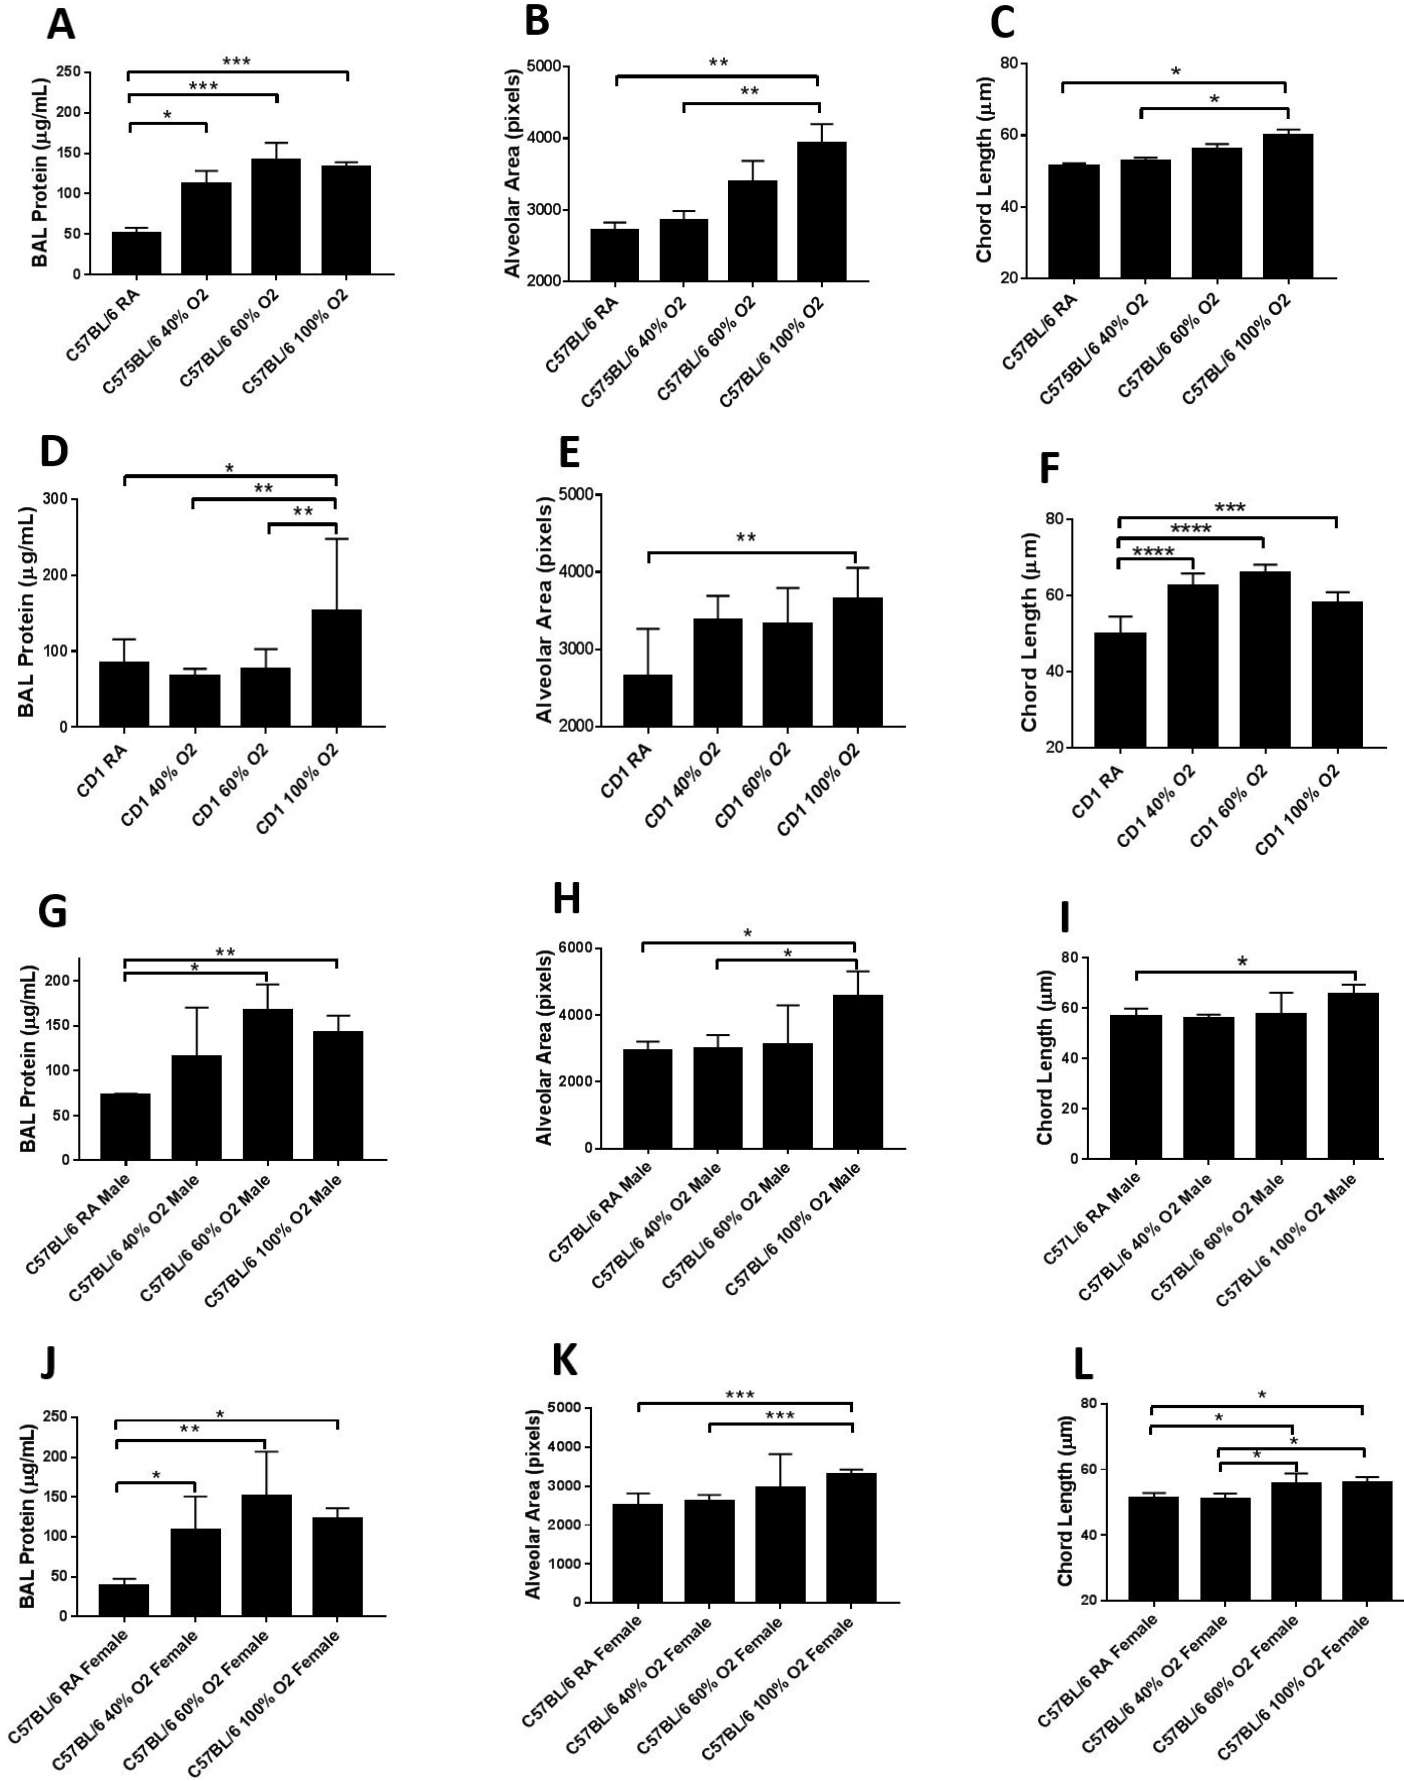

Supplement: mmc2.pdf [file mmc2.pdf]

# Supplemental Figure 3

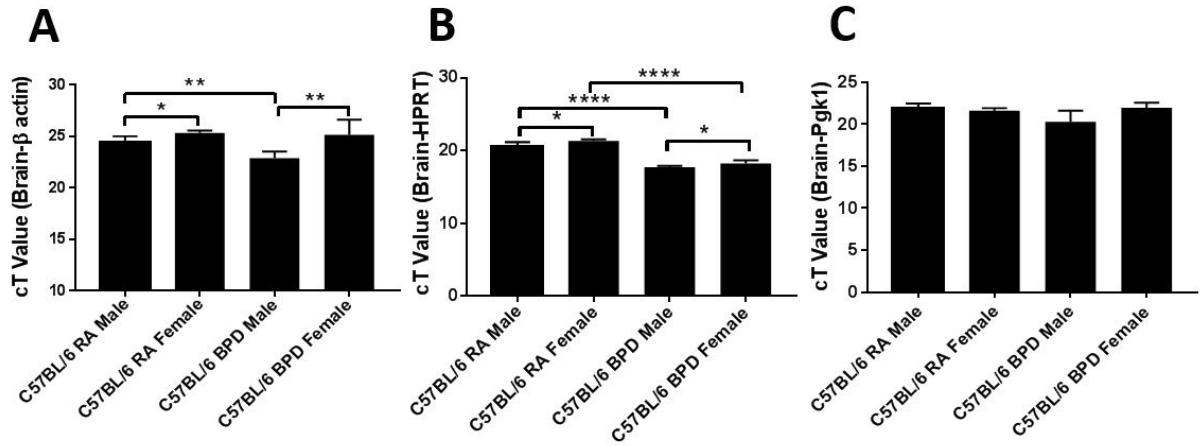

Supplement: mmc3.pdf [file mmc3.pdf]

# Supplemental Figure 4

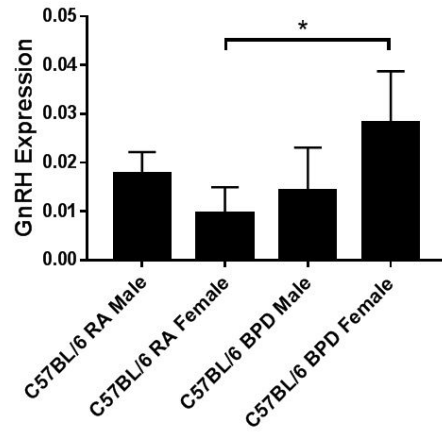

Supplement: mmc4.pdf [file mmc4.pdf]

# Supplemental Figure 5

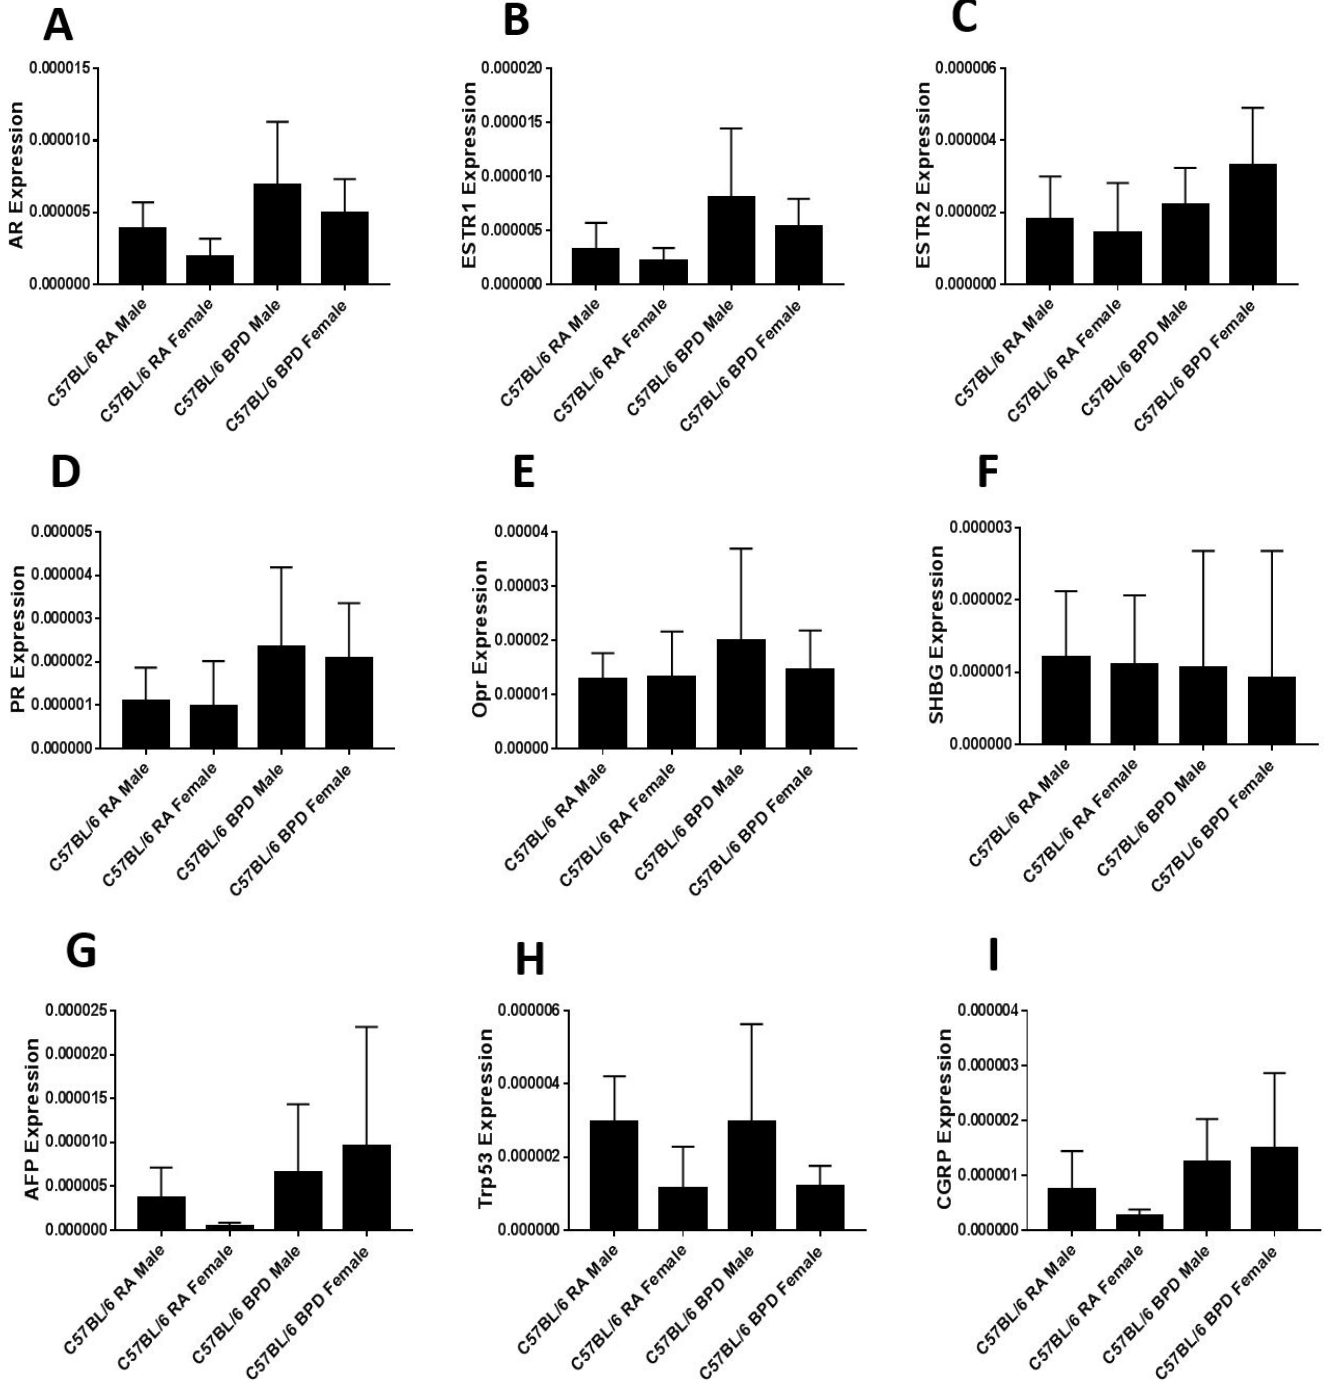

Supplement: mmc5.pdf [file mmc5.pdf]

# Supplemental Figure 6

**A**

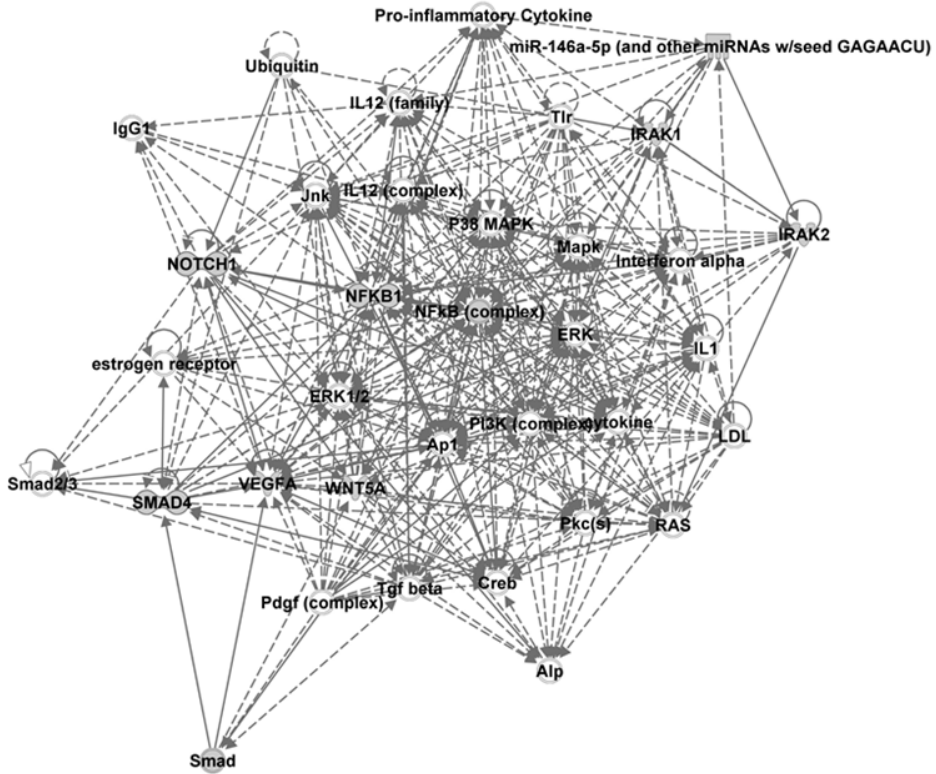

**B**

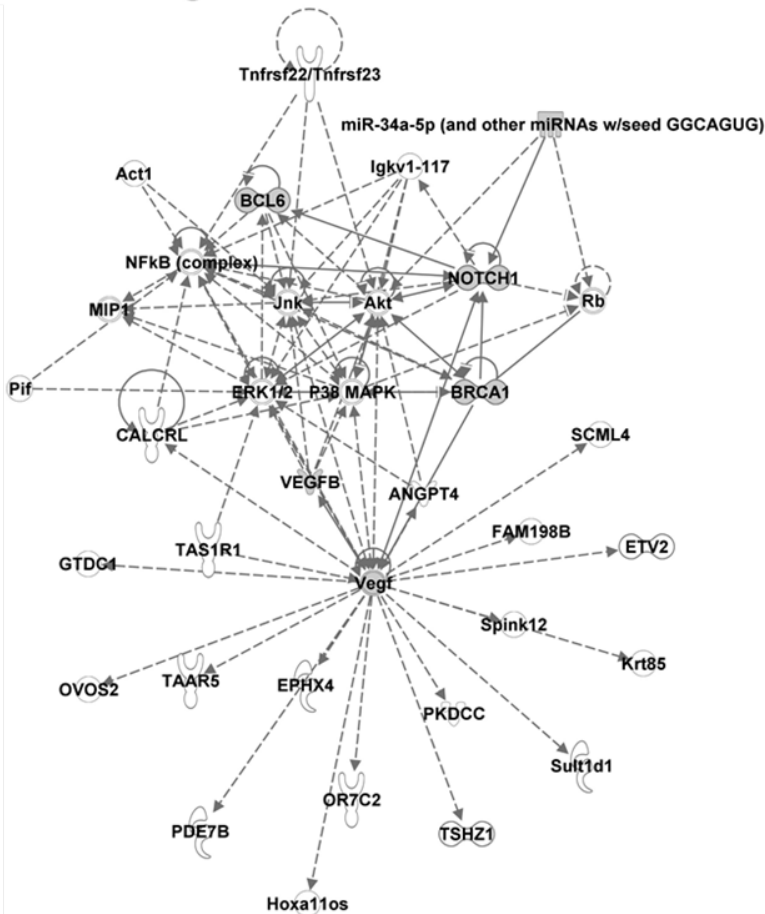

Supplement: mmc6.pdf [file mmc6.pdf]

# Supplemental Figure 7

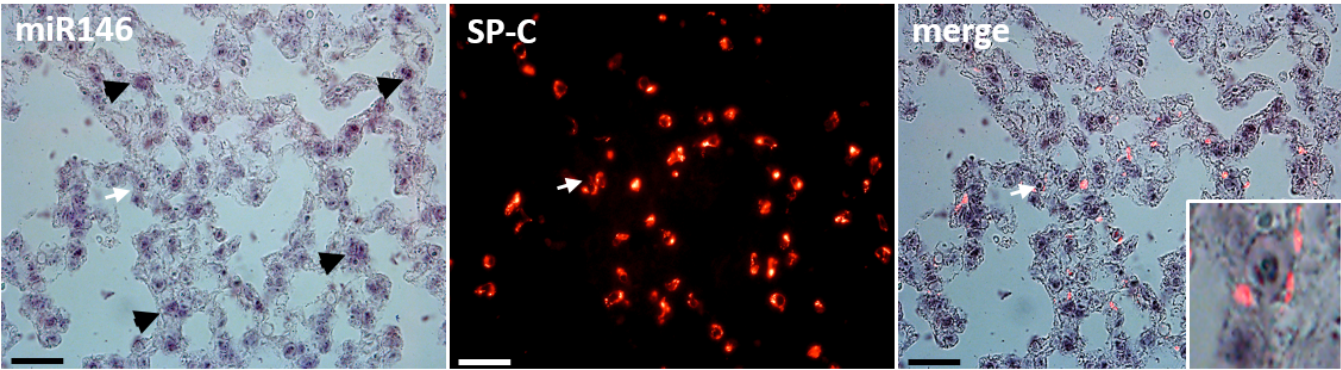

Supplement: mmc7.pdf [file mmc7.pdf]

## Supplemental Figure 8

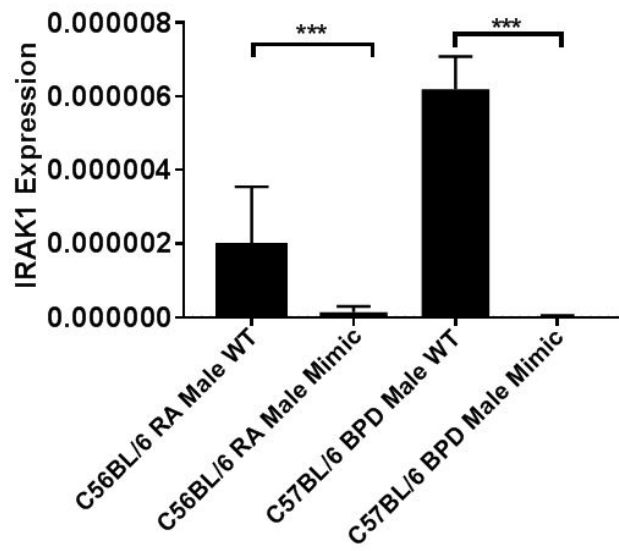

Supplement: mmc8.pdf [file mmc8.pdf]
